# Supplementary material
Source: PubMed Central journal article supplement (PMC3777616)
Supplement: NIHMS477333-supplement-1.pdf [file NIHMS477333-supplement-1.pdf]

## Supplementary Figure 1

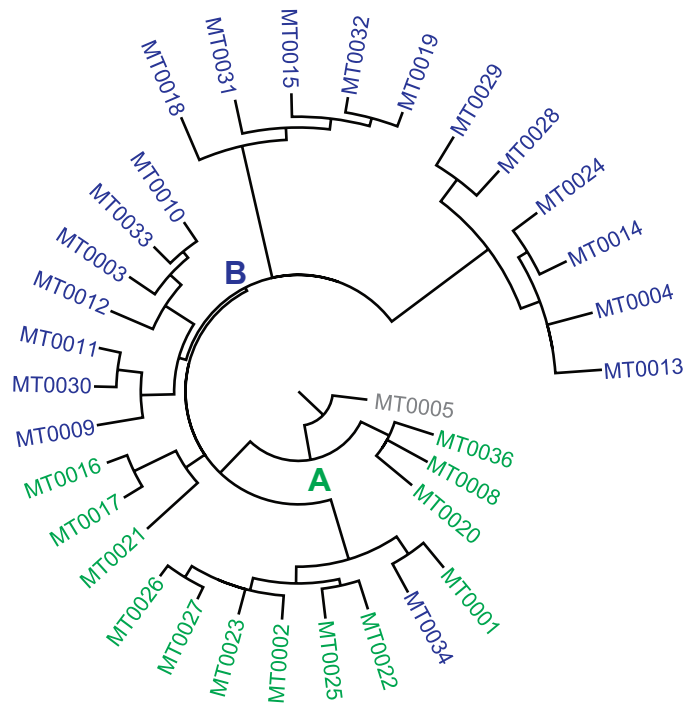

**Supplementary Figure 1 Phylogeny of isolates from human transmission chain.** A possible phylogeny of isolates from a human transmission chain in British Columbia, Canada. The phylogeny was reconstructed from concatenated SNPs, excluding SNPs in PE\_PGRS, PPE, and transposable elements (consistent with our previous analysis) using BEAST, v.1.7.2 to estimate the mutation rate under neutral conditions. The previously defined groupings are noted. Group A is shown in green, group B is shown in blue, and the historical isolate, MT0005 is shown in grey.

## Supplementary Figure 2

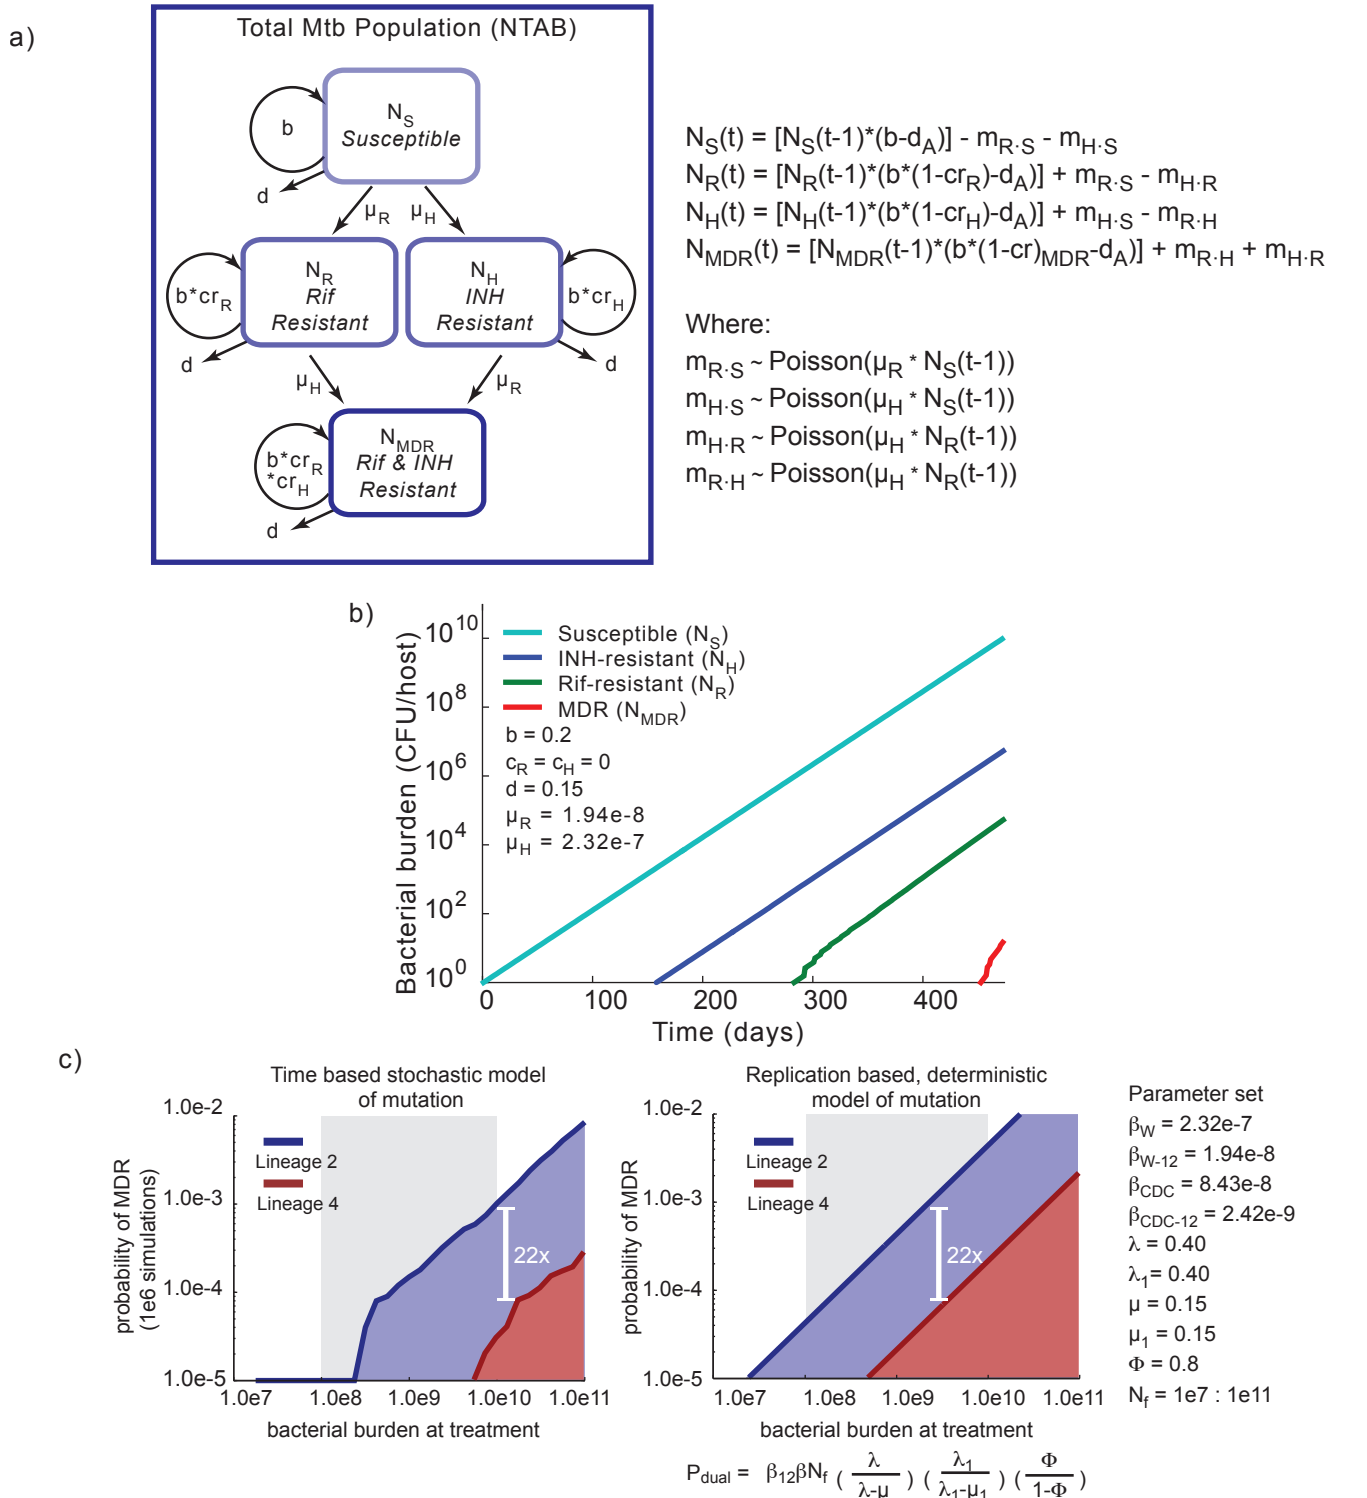

**Supplementary Figure 2 A stochastic simulation model of multidrug resistance. (a)** The structure and equations of the model for a single patient are displayed. The model was run multiple times in accordance with the parameter values displayed in Supplementary Table 5. **(b)** The results of the model for a single patient in whom multidrug resistance evolved. **(c)** A comparison of our model (left) and a model of multidrug resistance based on mutation occurring every generation, with allowance for mutation accrual before cell death (Colijn et al, 2010). Expected bacterial burden during treatment is shown by the grey background.

**Supplementary Table 1 Fluctuation analysis data**

| Strain   | Lineage       | Drug<br>( $\mu\text{g}/\mu\text{L}$ ) | MIC<br>Rif<br>INH<br>( $\mu\text{g}/\mu\text{L}$ ) | Total<br>cultures | $m^a$  | Cell<br>count <sup>b</sup> | Mutation<br>rate <sup>c</sup> | 95%<br>Confidence<br>Interval |
|----------|---------------|---------------------------------------|----------------------------------------------------|-------------------|--------|----------------------------|-------------------------------|-------------------------------|
| CDC-1551 | Euro-American | Rif<br>2                              | <0.01531<br><0.00766                               | 20                | 2.153  | 8.90e8                     | 2.42e-9                       | 1.14-3.82e-9                  |
| Erdman   | Euro-American | Rif<br>2                              | <0.01531<br><0.00766                               | 20                | 2.274  | 8.64e8                     | 2.63e-9                       | 1.26-4.13e-9                  |
| H37Rv    | Euro-American | Rif<br>2                              | <0.01531<br><0.00766                               | 20                | 4.337  | 8.73e8                     | 4.97e-9                       | 2.94-7.08e-9                  |
| X005581  | Euro-American | Rif<br>2                              | <0.01531<br><0.00766                               | 20                | 5.830  | 7.70e8                     | 7.57e-9                       | 4.09-8.58e-9                  |
| X000630  | Euro-American | Rif<br>2                              | <0.01531<br><0.00766                               | 20                | 4.815  | 8.50e8                     | 5.67e-9                       | 5.2-11.9e-9                   |
| HN878    | East Asian    | Rif<br>2                              | <0.01531<br><0.00766                               | 20                | 15.809 | 1.17e9                     | 1.35e-8                       | 1.10-1.61e-8                  |
| X005632  | East Asian    | Rif<br>2                              | <0.01531<br><0.00766                               | 20                | 7.898  | 8.80e7                     | 8.97e-8                       | 6.34-11.7e-8                  |
| X005631  | East Asian    | Rif<br>2                              | <0.01531<br><0.00766                               | 20                | 3.225  | 1.37e8                     | 2.36e-8                       | 1.26-3.52e-8                  |
| X005621  | East Asian    | Rif<br>2                              | <0.01531<br><0.00766                               | 20                | 5.523  | 2.04e8                     | 2.71e-8                       | 1.73-3.72e-8                  |
| CDC-1551 | Euro-American | Rif<br>0.5                            | <0.01531<br><0.00766                               | 20                | 5.100  | 6.08e8                     | 8.40e-9                       | 5.24- 11.7e-9                 |
| CDC-1551 | Euro-American | Rif<br>2                              | <0.01531<br><0.00766                               | 20                | 2.919  | 6.08e8                     | 4.81e-9                       | 2.48-7.28e-9                  |
| CDC-1551 | Euro-American | Rif<br>5                              | <0.01531<br><0.00766                               | 17                | 3.171  | 6.08e8                     | 5.22e-9                       | 2.73-7.88e-9                  |
| HN878    | East Asian    | Rif<br>0.5                            | <0.01531<br><0.00766                               | 16                | 16.998 | 9.38e8                     | 1.81e-8                       | 1.49-2.14e-8                  |
| HN878    | East Asian    | Rif<br>2                              | <0.01531<br><0.00766                               | 19                | 18.223 | 9.38e8                     | 1.94e-8                       | 1.61-2.28e-8                  |
| HN878    | East Asian    | Rif<br>5                              | <0.01531<br><0.00766                               | 20                | 9.311  | 9.38e8                     | 9.39e-9                       | 7.29-11.3e-9                  |
| CDC-1551 | Euro-American | INH<br>1                              | <0.01531<br><0.00766                               | 20                | 145.3  | 1.72e9                     | 8.43e-08                      | 8.14-8.72e-8                  |
| HN878    | East Asian    | INH<br>1                              | <0.01531<br><0.00766                               | 18                | 93.36  | 4.03e8                     | 2.32e-7                       | 2.19-2.43e-7                  |
| CDC-1551 | Euro-American | ETH<br>5                              | <0.01531<br><0.00766                               | 20                | 19.60  | 3.93e8                     | 4.98e-8                       | 4.18-5.80e-8                  |
| HN878    | East Asian    | ETH<br>5                              | <0.01531<br><0.00766                               | 20                | 20.02  | 1.60e8                     | 1.25e-7                       | 1.05-1.45e-7                  |

<sup>a</sup>m represents the estimated number of mutations per culture as determined by the MSS method. <sup>b</sup> Cell count is the average number of cells per culture plated on antibiotic. Dividing m by cell count gives the estimated mutation rate.

**Supplementary Table 2 Differences in AIC<sub>C</sub>**

| <b>Strain</b>   | <b>Rifampicin<br/>(ug/mL)</b> | <b>AIC<sub>C</sub>(LD) -<br/>AIC<sub>C</sub> (TP)</b> | <b>AIC<sub>C</sub>(LD) -<br/>AIC<sub>C</sub>(Poiss)</b> | <b>AIC<sub>C</sub>(TP) -<br/>AIC<sub>C</sub>(Poiss)</b> |
|-----------------|-------------------------------|-------------------------------------------------------|---------------------------------------------------------|---------------------------------------------------------|
| <b>CDC-1551</b> | <b>0.5</b>                    | -2.1711                                               | -221.7147                                               | -219.5436                                               |
| <b>CDC-1551</b> | <b>2</b>                      | -3.1706                                               | -101.3108                                               | -98.1402                                                |
| <b>CDC-1551</b> | <b>5</b>                      | -1.8248                                               | -34.8242                                                | -32.9994                                                |
| <b>HN878</b>    | <b>0.5</b>                    | -2.0739                                               | -248.8711                                               | -246.7972                                               |
| <b>HN878</b>    | <b>2</b>                      | -1.7125                                               | -632.029                                                | -630.3165                                               |
| <b>HN878</b>    | <b>5</b>                      | -0.608                                                | -118.6105                                               | -118.0026                                               |

**Supplementary Table 3 Target size**

| <i>E.coli</i> RpoB<br>Coord.<br>(amino acid) | Mtb<br>RpoB<br>Coord.<br>(amino acid) | Mtb <i>rpoB</i><br>coord.<br>(nucleotide) | Number of isolates<br>CDC -1551   |          |          | Number of isolates<br>HN878 |          |          |
|----------------------------------------------|---------------------------------------|-------------------------------------------|-----------------------------------|----------|----------|-----------------------------|----------|----------|
|                                              |                                       |                                           | <i>Drug Concentration (µg/mL)</i> |          |          |                             |          |          |
|                                              |                                       |                                           | 0.5                               | 2        | 5        | 0.5                         | 2        | 5        |
| Q513E                                        | Q438E                                 | <b>C1312G</b>                             | -                                 | -        | -        | 2                           | 1        | -        |
| Q513L                                        | Q438L                                 | <b>A1313T</b>                             | -                                 | -        | -        | 2                           | -        | -        |
| D516V                                        | D441V                                 | <b>A1322T</b>                             | 1                                 | -        | -        | 3                           | -        | -        |
| N519K                                        | N444K                                 | <b>C1332G</b>                             | -                                 | -        | -        | 1                           | -        | -        |
| S522L                                        | S447L                                 | <b>C1340T</b>                             | 7                                 | 7        | -        | 4                           | 13       | 2        |
| S522W                                        | S447W                                 | <b>C1340G</b>                             | 4                                 | 2        | 5        | 4                           | 3        | 3        |
| H526D                                        | H451D                                 | <b>C1351G</b>                             | 14                                | 9        | 4        | 9                           | 3        | 7        |
| H526Y                                        | H451Y                                 | <b>C1351T</b>                             | 10                                | 12       | 12       | 10                          | 15       | 14       |
| H526R                                        | H451R                                 | <b>A1352G</b>                             | 7                                 | 7        | 13       | 15                          | 10       | 14       |
| H526P                                        | H451P                                 | <b>A1352C**</b>                           | 1                                 | 4        | 5        | 1                           | 3        | 5        |
| H526L                                        | H451L                                 | <b>A1352T</b>                             | 2                                 | -        | -        | 1                           | -        | -        |
| S531L                                        | S456L                                 | <b>C1367T</b>                             | 11                                | 8        | 5        | 7                           | 16       | 18       |
| S531W                                        | S456W                                 | <b>C1367G</b>                             | 1                                 | 2        | 1        | 1                           | 2        | -        |
| <b>Total Target Size</b>                     |                                       |                                           | <b>10</b>                         | <b>8</b> | <b>7</b> | <b>13</b>                   | <b>9</b> | <b>7</b> |

\*\* A1352C represents both single mutations found at this single site (quantity per strain : 1,2,-,1,1,1 respectively), as well as three clustered mutations: C1350G, A1352C, A1354C (quantity per strain: -, 2,5,-,2,4). These three mutations were found together, and the first of the three is a silent mutation.

**Supplementary Table 4 Per base mutation rate from fluctuation analysis data on multiple concentrations of rifampicin**

| <b>Drug Conc. (µg/mL)</b> | <b>Strain</b>  | <b>Mutation Rate (mut./bp/gen.)</b> | <b>95% CI</b>       | <b>Wilcoxon Rank Sum p-value</b> |
|---------------------------|----------------|-------------------------------------|---------------------|----------------------------------|
| 0.5                       | <b>CDC1551</b> | 8.40e-10                            | 5.24e-10 – 1.17e-9  | 4.29e-06                         |
|                           | <b>HN878</b>   | 1.39e-09                            | 1.14e-9 - 1.65e-9   |                                  |
| 2                         | <b>CDC1551</b> | 6.01e-10                            | 3.10e-10 – 9.10e-10 | 1.85e-05                         |
|                           | <b>HN878</b>   | 2.16e-09                            | 1.79e-9 – 2.53e-9   |                                  |
| 5                         | <b>CDC1551</b> | 7.46e-10                            | 3.91e-10 – 1.13e-9  | 3.82e-04                         |
|                           | <b>HN878</b>   | 1.42e-09                            | 1.04e-9 – 1.80e-9   |                                  |

**Supplementary Table 5 Per base pair per day mutation rate estimates for isolates *in vivo* and *in vitro***

| <b>Sample</b>                                    | <b>Mutations (m)</b> | <b>Number of genomes</b> | <b>Average time per genome (days)</b> | <b>Mutation rate</b> | <b>95% CI</b>    |
|--------------------------------------------------|----------------------|--------------------------|---------------------------------------|----------------------|------------------|
| <b>Human isolates*</b>                           | n/a                  | 32                       | n/a                                   | 2.21e-10             | 1.90 – 2.52 e-10 |
| <b>Active Disease, cynomolgus macaque**</b>      | 4                    | 15                       | 261.85                                | 4.45e-10             | 4.01 - 4.88 e-10 |
| <b>Latent infection, cynomolgus macaque**</b>    | 3                    | 8                        | 293.52                                | 2.55e-10             | 6.59 – 93.3 e-10 |
| <b>Reactivated Disease, cynomolgus macaque**</b> | 7                    | 10                       | 488.69                                | 3.19e-10             | 1.44 - 7.38 e-10 |
| <b>All disease states, cynomolgus macaque**</b>  | 14                   | 33                       | 338.31                                | 3.14e-10             | 1.71 - 5.26 e-10 |
| <b><i>In vitro</i>, Erdman**</b>                 | 10                   | n/a                      | n/a                                   | 3.16e-10             | 1.51 - 4.95 e-10 |

\* Estimated using BEAST v1.7.2

\*\* Previously published, see reference (6).

**Supplementary Table 6 Parameter values for stochastic simulation mathematical model of multidrug resistance**

| <b>Variable</b>           | <b>Descriptor</b>                                          | <b>Figure 7a</b>                 | <b>Figure 7b</b>                               | <b>Figure 7c</b>                                |
|---------------------------|------------------------------------------------------------|----------------------------------|------------------------------------------------|-------------------------------------------------|
| <b>N<sub>S</sub>(t)</b>   | Susceptible bacterial population size at time (t)          | Variable                         | Variable                                       | Variable                                        |
| <b>N<sub>R</sub>(t)</b>   | Rifampicin Resistant bacterial population size at time (t) | Variable                         | Variable                                       | Variable                                        |
| <b>N<sub>H</sub>(t)</b>   | Isoniazid Resistant bacterial population size at time (t)  | Variable                         | Variable                                       | Variable                                        |
| <b>N<sub>MDR</sub>(t)</b> | Multidrug resistant bacterial population size at time (t)  | Variable                         | Variable                                       | Variable                                        |
| <b>b</b>                  | Bacterial growth rate, replications per day                | 0.40                             | 0.20 : 1.10, increments of 0.10                | 0.40                                            |
| <b>d<sub>A</sub></b>      | Bacterial death rate                                       | 0.15                             | 0.15                                           | 0.15                                            |
| <b>μ<sub>R-CDC</sub></b>  | Rifampicin resistance rate, CDC-1551                       | 2.42e-9                          | 2.42e-9                                        | 2.42e-9                                         |
| <b>μ<sub>H-CDC</sub></b>  | Isoniazid resistance rate, CDC-1551                        | 2.32e-7                          | 2.32e-7                                        | 2.32e-7                                         |
| <b>μ<sub>R-W</sub></b>    | Rifampicin resistance rate, HN878                          | 1.94e-8                          | 1.94e-8                                        | 1.94e-8                                         |
| <b>μ<sub>H-W</sub></b>    | Isoniazid resistance rate, HN878                           | 2.32e-7                          | 2.32e-7                                        | 2.32e-7                                         |
| <b>cr<sub>H</sub></b>     | Fitness cost of resistance, isoniazid resistance           | 0                                | 0                                              | 0 : 0.9, increments of 0.10                     |
| <b>cr<sub>R</sub></b>     | Fitness cost of resistance, rifampicin                     | 0                                | 0                                              | 0 : 0.9, increments of 0.10                     |
| <b>cr<sub>MDR</sub></b>   | Fitness cost of resistance, multidrug resistance           | cr <sub>H</sub> *cr <sub>R</sub> | cr <sub>H</sub> *cr <sub>R</sub>               | cr <sub>H</sub> *cr <sub>R</sub>                |
| <b>Number of runs</b>     | Number of simulated patients                               | 100,000 per strain               | 1,000,000 (100,000 per value of b, per strain) | 1,000,000 (100,000 per value of cr, per strain) |
